# Supplementary material for: Synchrotron X-ray nanoprobe and correlative electron microscopy reveal the role of surface chemistry of self-assembling peptides in calcium phosphate nucleation
Source: Royal Society of Chemistry journal article supplement (doi:10.1039/d5fd00017c), 2025-01-01
Supplement: d5fd00017c1.pdf [file d5fd00017c1.pdf]

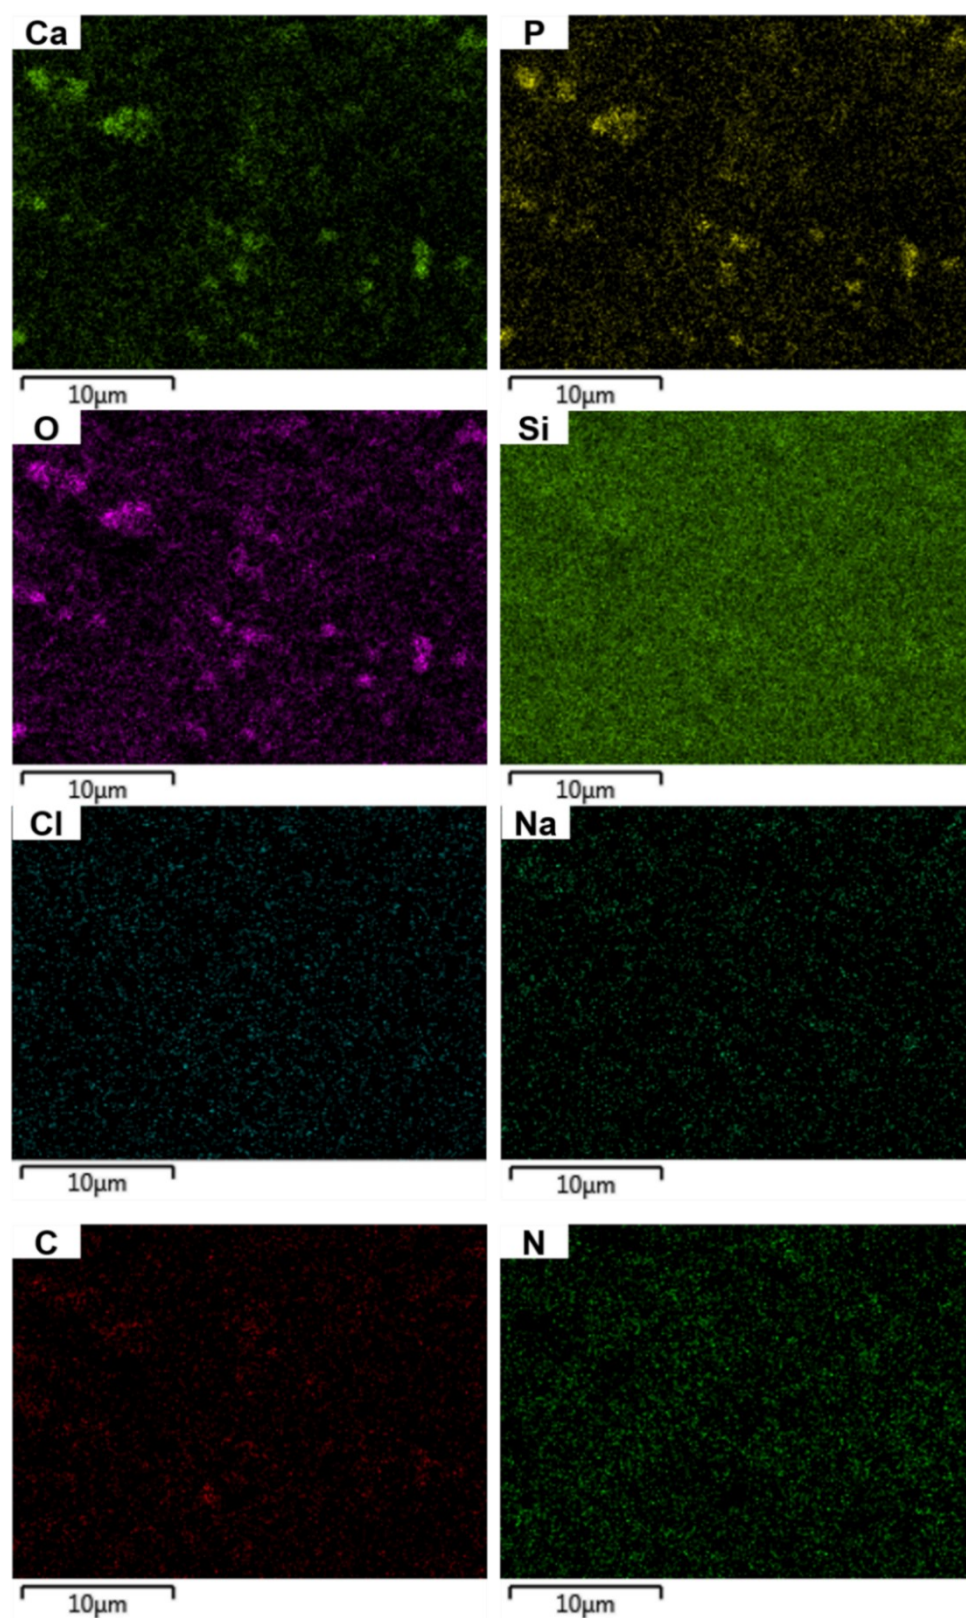

*Figure A: Energy Dispersive Spectrometry (EDS) analysis: elemental maps of the SEM image of the SiN window after immersion in mineralising solution for 12 hours in the presence of  $P_{11-4}$ , indicating the calcium phosphate structures are formed after 12 hours in the presence of  $P_{11-4}$ . Ca = Calcium, P = Phosphorus, O = oxygen, S = Silicon, Cl = Chlorine, Na = Sodium, C = Carbon and N = Nitrogen.*

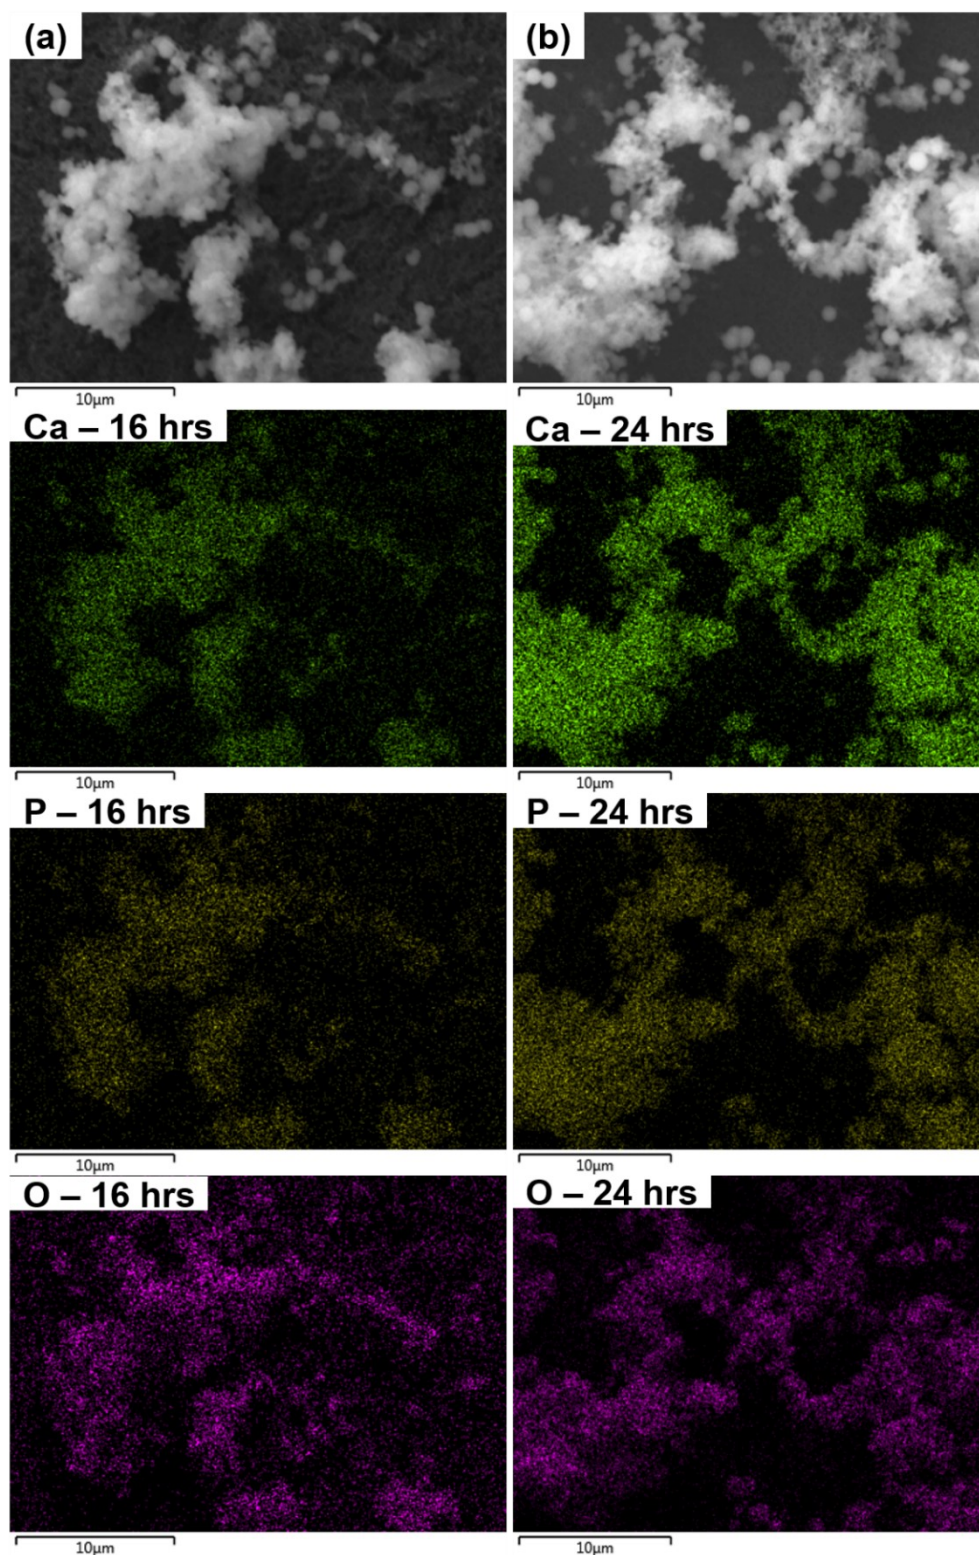

*Figure B: Energy Dispersive Spectrometry (EDS) analysis: elemental maps (underneath each image) of the SEM image of the SiN window after immersion in mineralising solution for (a) 16 hours and (b) 24 hours in the presence of  $P_{11-4}$ , indicating that the formed structures are made of calcium phosphate. The image mapped is on the top left at a magnification = x4000. The secondary electron detector was used at an energy of 20 kV, a working distance of 11 mm and a spot size of 60 nm. Ca = Calcium, P = Phosphorus, O = oxygen.*



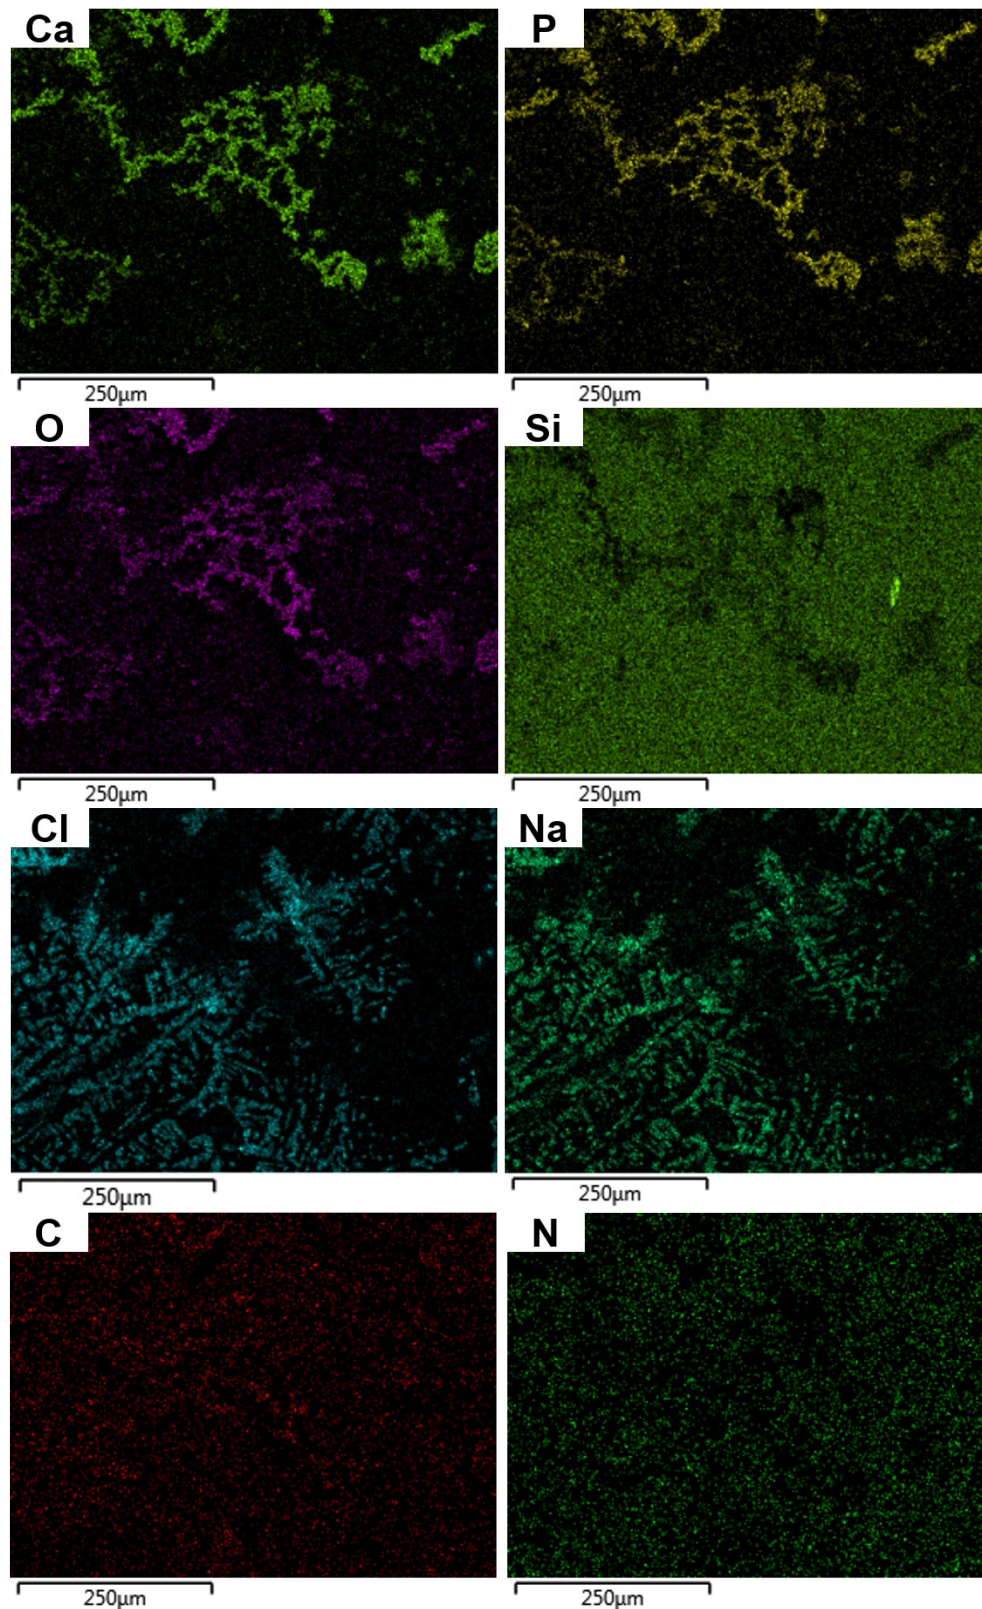

*Figure C: Energy Dispersive Spectrometry (EDS) analysis: elemental maps of the SEM image of the SiN window after immersion in mineralising solution for 48 hours in the presence of  $P_{11-4}$  (magnification = x4000). Ca = Calcium, P = Phosphorus, O = oxygen, S = Silicon, Cl = Chlorine, Na = Sodium, C = Carbon and N = Nitrogen.*

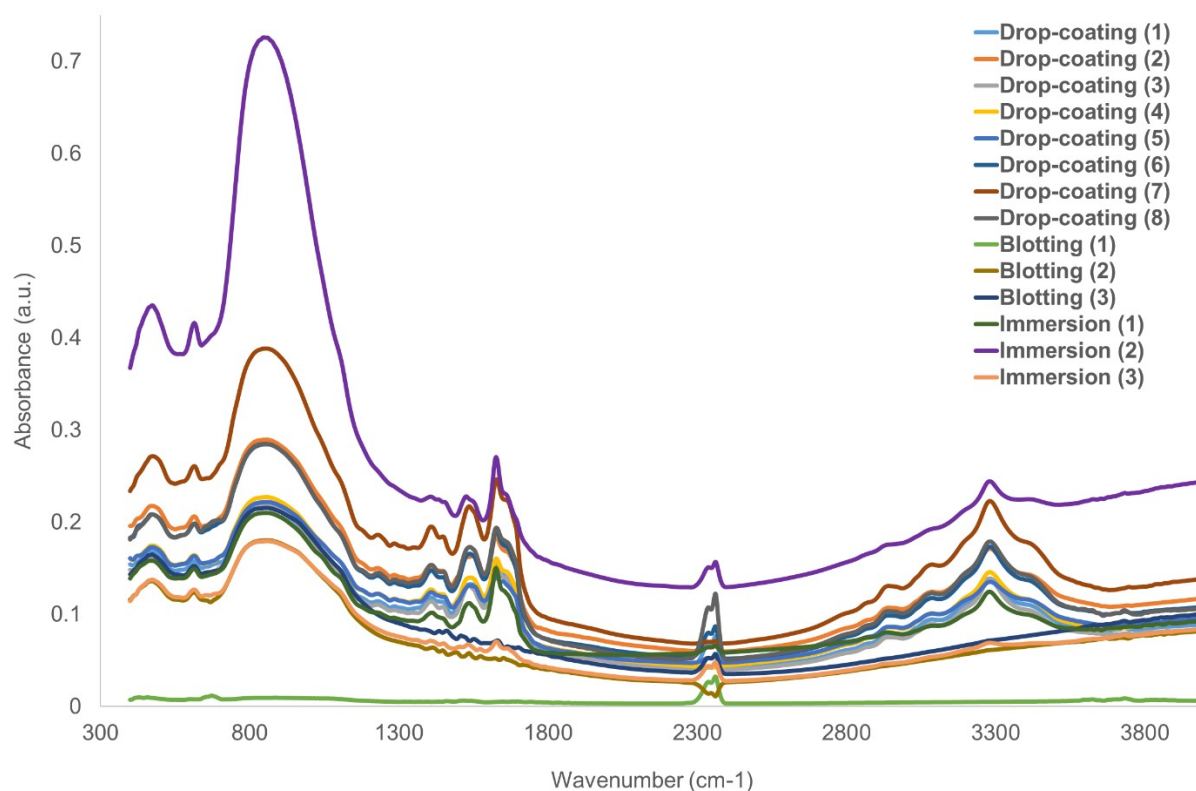

*Figure D: Fourier Transform Infrared Spectroscopy (FTIR) spectra of silicon nitride (SiN) windows with deposited  $P_{11-4}$  using three different deposition methods: blotting ( $n = 3$ ), drop-coating ( $n = 8$ ), and immersion ( $n = 3$ ). The peak at  $1620\text{ cm}^{-1}$  (wave number) is indicative of the presence of the  $\beta$ -sheet conformation.*

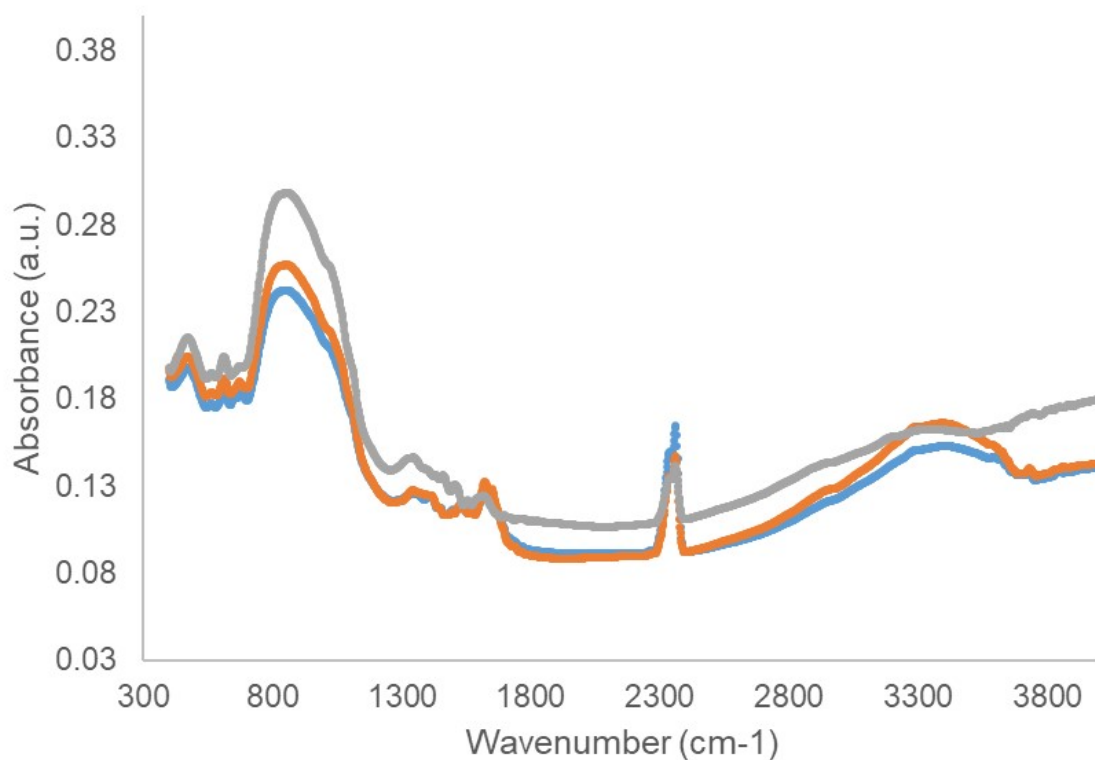

*Figure E: Fourier Transform Infrared Spectroscopy (FTIR) spectra of silicon nitride (SiN) windows with deposited  $P_{11-4}$  using the drop-coating method after immersion in mineralising solution (MS) for ~4-5 hours. The peak at 1620 cm<sup>-1</sup> (wave number) is indicative of the presence of the  $\beta$ -sheet conformation.*
